# Supplementary material for: A DFT study to probe homo-conjugated norbornylogous bridged spacers in dye-sensitized solar cells: an approach to suppressing agglomeration of dye molecules
Source: Royal Society of Chemistry journal article supplement (doi:10.1039/c9ra10898j), 2020-01-01
Supplement: c9ra10898j1.pdf [file c9ra10898j1.pdf]

## A DFT Study to Probe Homo-conjugated Norbornylogous Bridged Spacers in Dye-sensitized Solar cell: An Approach to Suppress Agglomeration of Dye Molecules

Anusuya Saha<sup>a</sup>, Bishwajit Ganguly<sup>a,b\*</sup>.

<sup>a</sup>Computation and Simulation Unit (Analytical Discipline and Centralized Instrument Facility) Industrial Research Central Salt & Marine Chemicals Research Institute (CSIR-CSMCRI), Bhavnagar, Gujarat-364002, India.

<sup>b</sup>Academy of Scientific and Innovative Research, Council of Scientific Research, CSIR-CSMCRI, Bhavnagar, Gujarat, India- 364002.

\*Corresponding Author. Fax: (+91)-278-2567562, E-mail: ganguly@csmcri.res.in; gang\_12@rediffmail.com

An experimental system was computed using different DFT methods. Those computed values were compared and the method gives closest value to the experimental data was used for further study.

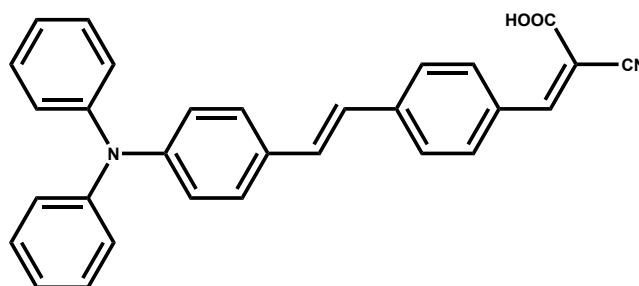

Figure S1. Structure for (Z)-2-cyano-3-(4-((E)-4-(diphenylamino)styryl)phenyl)acrylic acid (TA-ST-CA), the experimental system [*Chem. Commun.*, 2007, **46**, 4887–4889].

Table S1. UV-Visible absorption ( $\lambda_{\max}$ ) for TA-ST-CA in different DFT methods using 6-31G(d) basis set and CPCM solvent model with THF solvent.

| Experimental | B3LYP/6-31G(d) | PBEPBE/6-31G(d) | MPW1PW91/6-31G(d) | CAM-B3LYP/6-31G(d) |
|--------------|----------------|-----------------|-------------------|--------------------|
| 386 nm       | 584 nm         | 479 nm          | 546 nm            | 411 nm             |

The structure of TA-ST-CA could not be optimized with WB97XD/6-31G(d) level due to failure of convergence criteria. Hence, this value is not incorporated in the manuscript.

Table S2. Calculate values of  $\lambda_{\max}$ , HOMO, LUMO,  $\Delta G_{\text{inject}}$ ,  $\Delta G_{\text{rejection}}$ ,  $V_{\text{OC}}$  for system TA-ST-CA with CAM-B3LYP/6-31G(d) level of theory.

| System   | $\lambda_{\max}$ | HOMO | LUMO  | HOMO-LUMO gap | $\Delta G_{\text{inject}}$ | $\Delta G_{\text{rejection}}$ | $V_{\text{OC}}$ |
|----------|------------------|------|-------|---------------|----------------------------|-------------------------------|-----------------|
| TA-ST-CA | 411              | -5.4 | -1.25 | 4.17          | 1.7                        | 0.84                          | 2.8             |

CAM-B3LYP/6-31G(d) level of theory was employed to calculate an experimentally reported system (TA-ST-CA) [*Chem. Commun.*, 2007, **46**, 4887–4889]. The experimentally reported absorption maxima ( $\lambda_{\max}$ ) for TA-ST-CA is 398 nm and calculated value was observed to be 411 nm. The HOMO energy level of the system was experimentally determined from the oxidation potential value w.r.t ferrocene using Ag/AgCl as reference electrode in acetonitrile electrode. The calculated HOMO energy (5.4 eV) of the system is in close agreement with the experimentally observed HOMO (5.2 eV). The calculated LUMO value of the system is 1.25 eV which is lower than that of the experimentally reported LUMO (2.8 eV). It is to note that experimentally the LUMO was calculated from the absorption edge of absorption spectra and HOMO [*Chem. Commun.*, 2007, **46**, 4887–4889]. Therefore, the variation in the LUMO result may be expected.

Table S3. Calculated values for f, LHE,  $\lambda_{\max}$ ,  $\Delta G_{\text{injec}}$ ,  $\Delta G_{\text{rejection}}$ ,  $V_{\text{OC}}$  for the system 6 using CAM-B3LYP/6-311+G(d) in THF solvent and CPCM solvent model.

| System | $\lambda_{\max}$ | f    | LHE  | HOMO | LUMO | HOMO-LUMO gap | $\Delta G_{\text{inject}}$ | $\Delta G_{\text{rejection}}$ | $V_{\text{OC}}$ |
|--------|------------------|------|------|------|------|---------------|----------------------------|-------------------------------|-----------------|
| 6      | 292.84           | 0.49 | 0.68 | 5.7  | 1.07 | 4.63          | 1.5                        | 1.1                           | 2.9             |

Coordinates for:

system 1:

|   |   |             |             |             |
|---|---|-------------|-------------|-------------|
| C | 0 | -7.01065200 | 0.30026200  | 0.05140500  |
| C | 0 | -6.84302600 | -0.96599900 | -0.83183900 |
| C | 0 | -5.37123600 | -1.14946000 | 0.68138500  |
| C | 0 | -6.09063800 | 0.15876700  | 1.01922100  |
| C | 0 | -5.51029400 | -0.80289800 | -1.57179100 |
| H | 0 | -5.38977600 | -0.57874700 | -2.62393000 |
| C | 0 | -4.56472100 | -0.92787100 | -0.62898600 |
| H | 0 | -7.69522600 | -1.30607300 | -1.41540300 |
| H | 0 | -4.87342700 | -1.67403400 | 1.49146300  |
| C | 0 | -3.15244500 | -0.76576200 | -0.83831100 |
| H | 0 | -2.82606300 | -0.67757300 | -1.87164500 |
| C | 0 | -0.73586100 | -0.49363000 | -0.40122700 |
| C | 0 | -2.15475100 | -0.68625400 | 0.06903700  |
| O | 0 | -0.48922800 | -0.42694000 | -1.60050800 |
| O | 0 | 0.12790700  | -0.41301400 | 0.56434200  |
| N | 0 | -7.82359600 | 1.35811200  | -0.28154500 |
| C | 0 | -9.13757500 | 1.08356300  | -0.84379300 |
| H | 0 | -9.85195500 | 0.72170900  | -0.08928200 |
| H | 0 | -9.53561100 | 2.00279300  | -1.28047100 |
| H | 0 | -9.06818500 | 0.34007300  | -1.63869200 |
| C | 0 | -7.78685100 | 2.48226300  | 0.63439100  |
| H | 0 | -8.34756800 | 3.31621300  | 0.20626000  |
| H | 0 | -8.21829100 | 2.23580400  | 1.61682900  |
| H | 0 | -6.75130100 | 2.79813100  | 0.78386100  |
| C | 0 | -2.37179500 | -0.75256300 | 1.48140500  |
| N | 0 | -2.55514800 | -0.80318200 | 2.62422800  |
| O | 0 | 4.28325700  | 2.12861200  | 1.11530100  |

|    |    |             |             |             |
|----|----|-------------|-------------|-------------|
| Ti | -1 | 4.16515900  | 0.19157900  | 1.65151600  |
| Ti | -1 | 2.04305900  | -0.07041700 | 0.24912900  |
| O  | -1 | 2.42023600  | -1.83948200 | -0.74393100 |
| O  | -1 | 2.33768400  | -0.01872600 | 2.21127500  |
| O  | -1 | 1.92471400  | 1.78586200  | -0.64710600 |
| O  | -1 | 5.09429900  | -1.61479100 | 1.21489500  |
| Ti | -1 | 4.34636300  | -1.47444100 | -0.64177900 |
| O  | -1 | 5.47032000  | -2.26003000 | -2.06992600 |
| Ti | -1 | 3.88356000  | 1.94048300  | -0.56815500 |
| O  | -1 | 4.73705800  | 3.05657000  | -1.96319300 |
| O  | -1 | 4.07816500  | 0.22025600  | -0.20259800 |
| H  | -1 | 5.12550100  | -2.00183100 | -2.92761400 |
| H  | -1 | 4.45941400  | 2.75303900  | -2.83073800 |
| H  | 0  | -5.80249000 | 0.83859900  | 1.80701800  |
| O  | 0  | -6.46364300 | -1.92502000 | 0.15301800  |

System 2:

|   |             |             |             |
|---|-------------|-------------|-------------|
| C | -7.25528700 | -0.32036300 | 0.14203800  |
| C | -7.12472700 | 1.03098800  | -0.59926900 |
| C | -5.51380700 | -0.31094600 | -1.38077400 |
| C | -6.28919500 | -1.12302600 | -0.33408300 |
| C | -5.79746700 | 1.64042200  | -0.17159000 |
| H | -5.68282000 | 2.52817400  | 0.44010900  |
| C | -4.81230800 | 0.84500700  | -0.63344900 |
| H | -7.99337200 | 1.68671400  | -0.55923100 |
| H | -4.89608000 | -0.88440600 | -2.06725700 |
| C | -3.42166400 | 1.07213500  | -0.35572500 |
| H | -3.19005800 | 1.99021800  | 0.17957100  |
| C | -0.98085400 | 0.79636000  | -0.21403700 |

|    |             |             |             |
|----|-------------|-------------|-------------|
| C  | -2.33614500 | 0.31652000  | -0.64298200 |
| O  | -0.84150400 | 1.85473100  | 0.37974000  |
| O  | -0.00507200 | -0.01266000 | -0.53791400 |
| N  | -8.25001100 | -0.56232600 | 1.07382200  |
| C  | -8.55458100 | 0.49409700  | 2.02708300  |
| H  | -9.51638000 | 0.28356400  | 2.50269500  |
| H  | -7.79185000 | 0.57984800  | 2.81684700  |
| H  | -8.63163000 | 1.45671600  | 1.51992200  |
| C  | -8.22991700 | -1.88698400 | 1.66252200  |
| H  | -7.34735200 | -2.04970300 | 2.30185400  |
| H  | -9.12864200 | -2.02764100 | 2.26807700  |
| H  | -8.22137700 | -2.63930500 | 0.86969800  |
| C  | -2.39411800 | -0.93958800 | -1.32358900 |
| N  | -2.42708000 | -1.95992000 | -1.87132100 |
| H  | -6.02421800 | -2.12063000 | -0.01266800 |
| H  | -7.44318500 | -0.14433200 | -2.45652200 |
| O  | 2.69844500  | -1.52457300 | -0.82051400 |
| Ti | 1.87536600  | -0.06049700 | -0.13795500 |
| Ti | 3.71815400  | -0.06871900 | 1.96073400  |
| O  | 4.60493900  | 1.48065700  | 1.46898800  |
| O  | 1.90041100  | -0.09283800 | 1.67769100  |
| O  | 4.60683900  | -1.60839600 | 1.44487400  |
| O  | 2.69957500  | 1.41144200  | -0.81703600 |
| Ti | 4.47254200  | 1.47052100  | -0.33205400 |
| O  | 5.30312100  | 2.98613000  | -0.92176100 |
| Ti | 4.48391300  | -1.58738300 | -0.35640200 |
| O  | 5.29553000  | -3.10057700 | -0.97799100 |
| O  | 5.25276200  | -0.05686900 | -0.99199300 |
| H  | 5.67280200  | 3.70265200  | -0.38736900 |
| H  | 5.48607200  | -3.90983000 | -0.48328100 |

|   |             |            |             |
|---|-------------|------------|-------------|
| C | -6.68891700 | 0.49139400 | -1.98683600 |
| H | -6.37815500 | 1.28490900 | -2.67358200 |

System 3:

|   |             |             |             |
|---|-------------|-------------|-------------|
| C | 4.65248400  | 1.80774200  | -0.54873400 |
| C | 3.96819400  | 1.31233000  | -1.81925700 |
| C | 2.46805300  | 1.22419100  | -0.29251200 |
| C | 3.72036200  | 1.74544700  | 0.40276300  |
| C | 3.68567000  | -0.19768000 | -1.62251900 |
| H | 4.20848600  | -1.00311600 | -2.12043400 |
| C | 2.75729900  | -0.25817700 | -0.67587300 |
| H | 4.34608900  | 1.62230100  | -2.79120500 |
| H | 1.48567300  | 1.43595800  | 0.11890600  |
| C | 5.98083500  | 1.72220100  | 0.19635300  |
| H | 6.87433600  | 2.14513300  | -0.25675200 |
| C | 4.48356600  | 1.61316400  | 1.72049900  |
| H | 4.01392400  | 1.95573800  | 2.64091100  |
| C | 6.07064200  | 0.27106800  | 0.76779300  |
| C | 5.14363300  | 0.22232200  | 1.73976700  |
| H | 4.83362100  | -0.60639700 | 2.35858400  |
| C | 2.12395400  | -1.44005700 | 0.00164300  |
| H | 2.13178100  | -1.26809100 | 1.08666600  |
| C | 0.63537800  | -1.62526100 | -0.38497900 |
| C | 2.87796800  | -2.67132900 | -0.25090100 |
| O | 0.21711300  | -2.69027900 | -0.79554400 |
| O | -0.06011500 | -0.54703600 | -0.18768100 |
| N | 3.50532000  | -3.62154400 | -0.44207300 |
| N | 6.85191200  | -0.71215000 | 0.21618000  |
| C | 8.15047300  | -0.36592700 | -0.34102500 |

|    |             |             |             |
|----|-------------|-------------|-------------|
| H  | 8.90379700  | -0.16496300 | 0.43506100  |
| H  | 8.50442200  | -1.19711400 | -0.95532100 |
| H  | 8.07200400  | 0.51199800  | -0.98318000 |
| C  | 6.79182900  | -2.00458500 | 0.87305100  |
| H  | 7.35286000  | -2.73466000 | 0.28590700  |
| H  | 7.21012800  | -1.97372000 | 1.89059300  |
| H  | 5.75237200  | -2.33645400 | 0.93413500  |
| O  | -4.85798000 | 1.32968000  | -1.37476800 |
| Ti | -4.26699000 | -0.40551100 | -1.67526200 |
| Ti | -1.96360800 | -0.13078200 | -0.20969400 |
| O  | -2.63973200 | -1.18460800 | 1.13454200  |
| O  | -2.45153100 | -0.52932500 | -1.91934900 |
| O  | -2.39888800 | 1.56995800  | 0.22787500  |
| O  | -5.10428700 | -1.57209500 | -0.49907500 |
| Ti | -4.45330600 | -1.12162500 | 1.12457500  |
| O  | -5.15958600 | -2.23907900 | 2.39044200  |
| Ti | -4.22934200 | 1.81365900  | 0.24303300  |
| O  | -4.67255000 | 3.54913700  | 0.61380800  |
| O  | -4.87428500 | 0.64560600  | 1.47470100  |
| H  | -4.76525000 | -2.39191600 | 3.26131200  |
| H  | -4.58578400 | 3.95442700  | 1.48898200  |
| O  | 2.64825000  | 1.83820800  | -1.57960400 |
| O  | 5.62737500  | 2.43329900  | 1.38619900  |

System 4:

|   |            |            |             |
|---|------------|------------|-------------|
| C | 4.65248400 | 1.80774200 | -0.54873400 |
| C | 3.96819400 | 1.31233000 | -1.81925700 |
| C | 2.46805300 | 1.22419100 | -0.29251200 |
| C | 3.72036200 | 1.74544700 | 0.40276300  |

|    |             |             |             |
|----|-------------|-------------|-------------|
| C  | 3.68567000  | -0.19768000 | -1.62251900 |
| H  | 4.20848600  | -1.00311600 | -2.12043400 |
| C  | 2.75729900  | -0.25817700 | -0.67587300 |
| H  | 4.34608900  | 1.62230100  | -2.79120500 |
| H  | 1.48567300  | 1.43595800  | 0.11890600  |
| C  | 5.98083500  | 1.72220100  | 0.19635300  |
| H  | 6.87433600  | 2.14513300  | -0.25675200 |
| C  | 4.48356600  | 1.61316400  | 1.72049900  |
| H  | 4.01392400  | 1.95573800  | 2.64091100  |
| C  | 6.07064200  | 0.27106800  | 0.76779300  |
| C  | 5.14363300  | 0.22232200  | 1.73976700  |
| H  | 4.83362100  | -0.60639700 | 2.35858400  |
| C  | 2.12395400  | -1.44005700 | 0.00164300  |
| H  | 2.13178100  | -1.26809100 | 1.08666600  |
| C  | 0.63537800  | -1.62526100 | -0.38497900 |
| C  | 2.87796800  | -2.67132900 | -0.25090100 |
| O  | 0.21711300  | -2.69027900 | -0.79554400 |
| O  | -0.06011500 | -0.54703600 | -0.18768100 |
| N  | 3.50532000  | -3.62154400 | -0.44207300 |
| N  | 6.85191200  | -0.71215000 | 0.21618000  |
| C  | 8.15047300  | -0.36592700 | -0.34102500 |
| H  | 8.90379700  | -0.16496300 | 0.43506100  |
| H  | 8.50442200  | -1.19711400 | -0.95532100 |
| H  | 8.07200400  | 0.51199800  | -0.98318000 |
| C  | 6.79182900  | -2.00458500 | 0.87305100  |
| H  | 7.35286000  | -2.73466000 | 0.28590700  |
| H  | 7.21012800  | -1.97372000 | 1.89059300  |
| H  | 5.75237200  | -2.33645400 | 0.93413500  |
| O  | -4.85798000 | 1.32968000  | -1.37476800 |
| Ti | -4.26699000 | -0.40551100 | -1.67526200 |



|    |             |             |             |
|----|-------------|-------------|-------------|
| Ti | -1.96360800 | -0.13078200 | -0.20969400 |
| O  | -2.63973200 | -1.18460800 | 1.13454200  |
| O  | -2.45153100 | -0.52932500 | -1.91934900 |
| O  | -2.39888800 | 1.56995800  | 0.22787500  |
| O  | -5.10428700 | -1.57209500 | -0.49907500 |
| Ti | -4.45330600 | -1.12162500 | 1.12457500  |
| O  | -5.15958600 | -2.23907900 | 2.39044200  |
| Ti | -4.22934200 | 1.81365900  | 0.24303300  |
| O  | -4.67255000 | 3.54913700  | 0.61380800  |
| O  | -4.87428500 | 0.64560600  | 1.47470100  |
| H  | -4.76525000 | -2.39191600 | 3.26131200  |
| H  | -4.58578400 | 3.95442700  | 1.48898200  |
| O  | 2.64825000  | 1.83820800  | -1.57960400 |
| O  | 5.62737500  | 2.43329900  | 1.38619900  |

System 4:

|   |            |             |             |
|---|------------|-------------|-------------|
| C | 4.71372400 | 1.89552000  | -0.62144000 |
| C | 4.02695600 | 1.41638300  | -1.89407400 |
| C | 2.50785700 | 1.33804500  | -0.22140900 |
| C | 3.81413800 | 1.85324200  | 0.36640300  |
| C | 3.67428800 | -0.07057400 | -1.66465300 |
| H | 4.13841900 | -0.90265700 | -2.17999600 |
| C | 2.78123800 | -0.12043300 | -0.67908400 |
| H | 4.49716100 | 1.64755000  | -2.85017000 |
| H | 1.58858500 | 1.48240200  | 0.34363700  |
| C | 6.09456600 | 1.89053500  | 0.01621100  |
| H | 6.94551900 | 2.19376900  | -0.59637800 |
| C | 4.57414500 | 1.83278100  | 1.68648800  |
| H | 4.02994600 | 2.09107900  | 2.59549800  |

|    |             |             |             |
|----|-------------|-------------|-------------|
| C  | 6.24676100  | 0.51922400  | 0.73231600  |
| C  | 5.34943300  | 0.49910700  | 1.72559100  |
| H  | 5.15696700  | -0.31039300 | 2.41855500  |
| C  | 2.17223200  | -1.32716000 | -0.01302100 |
| H  | 2.16266700  | -1.16097600 | 1.07260900  |
| C  | 0.69887400  | -1.55241700 | -0.42433100 |
| C  | 2.96249600  | -2.53649100 | -0.26540700 |
| O  | 0.32299400  | -2.61197700 | -0.88820200 |
| O  | -0.04440500 | -0.50965100 | -0.19530400 |
| N  | 3.61474000  | -3.46938100 | -0.45800900 |
| O  | -4.86550000 | 1.28081600  | -1.35651300 |
| Ti | -4.27535500 | -0.45686600 | -1.65244600 |
| Ti | -1.95815200 | -0.17878500 | -0.19437500 |
| O  | -2.62915900 | -1.23568400 | 1.14318700  |
| O  | -2.45994300 | -0.58831400 | -1.89645500 |
| O  | -2.39886300 | 1.52168500  | 0.24303500  |
| O  | -5.10384800 | -1.62904000 | -0.47255000 |
| Ti | -4.44799200 | -1.17372400 | 1.14574400  |
| O  | -5.14549100 | -2.29504300 | 2.41341300  |
| Ti | -4.22964200 | 1.75820400  | 0.25990000  |
| O  | -4.67605000 | 3.49327700  | 0.63253900  |
| O  | -4.86876200 | 0.59061100  | 1.49856600  |
| H  | -4.78664900 | -2.39111800 | 3.30751500  |
| H  | -4.56693600 | 3.90337700  | 1.50296000  |
| H  | 5.44474100  | 3.77164200  | 1.01499000  |
| H  | 1.86012800  | 1.66646300  | -2.31794800 |
| C  | 5.75545100  | 2.75339700  | 1.26350300  |
| C  | 2.61971700  | 2.01800700  | -1.61439500 |
| H  | 2.61741800  | 3.10977200  | -1.56203300 |
| H  | 6.56318000  | 2.76943300  | 1.99999900  |

|   |            |             |             |
|---|------------|-------------|-------------|
| C | 7.17735200 | -0.50815800 | 0.28974900  |
| H | 7.90849100 | -0.22648800 | -0.47864100 |
| N | 7.15045300 | -1.69620600 | 0.76466400  |
| N | 8.11599400 | -2.57335200 | 0.34565400  |
| H | 7.75636800 | -3.51972800 | 0.37864100  |
| H | 8.49764900 | -2.36524700 | -0.57789100 |

System 5:

|   |             |             |             |
|---|-------------|-------------|-------------|
| C | 0.67596400  | -0.20848500 | 1.14932600  |
| C | 1.07945900  | -0.63488200 | 2.56028400  |
| C | 2.25980000  | 1.10863700  | 2.12030800  |
| C | 1.40620600  | 0.86783700  | 0.88151600  |
| C | 2.53220200  | -1.14392700 | 2.46885200  |
| H | 2.84700700  | -2.17527200 | 2.56324400  |
| C | 3.28279300  | -0.06918800 | 2.18530800  |
| H | 0.38902000  | -1.21072700 | 3.17196800  |
| H | 2.62723900  | 2.10598200  | 2.33977900  |
| C | 1.28255600  | 1.08550900  | -0.62991300 |
| H | 2.07609800  | 1.62475700  | -1.14260800 |
| C | 0.10337300  | -0.65034300 | -0.20122200 |
| H | -0.18210400 | -1.69147800 | -0.33619300 |
| C | -0.16781900 | 1.50784200  | -0.90362100 |
| C | -0.91754200 | 0.43309800  | -0.64221100 |
| C | 4.68591500  | -0.08100300 | 1.89364300  |
| H | 5.21775400  | -1.00403300 | 2.10914600  |
| C | 6.87672600  | 0.67779900  | 1.07411400  |
| C | 5.43750700  | 0.90309900  | 1.34617900  |
| O | 7.43780300  | -0.40736100 | 1.37423600  |
| O | 7.55445700  | 1.59649900  | 0.51087300  |

|    |             |             |             |
|----|-------------|-------------|-------------|
| C  | 4.90451700  | 2.16775400  | 0.94384500  |
| N  | 4.46229900  | 3.18413500  | 0.60865200  |
| H  | -0.47957700 | 2.51007800  | -1.16541200 |
| O  | 1.21294600  | -0.29829500 | -1.05843700 |
| O  | 1.33831600  | 0.66127600  | 3.13014400  |
| O  | 10.22378300 | -0.76738200 | 1.44446400  |
| Ti | 9.25253000  | 0.37759400  | 0.36188100  |
| Ti | 11.70671600 | 1.25830700  | -0.68902700 |
| O  | 11.47116400 | 0.55412700  | -2.38325000 |
| O  | 10.24160700 | 1.90530600  | 0.17838100  |
| O  | 12.79274500 | 0.20368900  | 0.35743200  |
| O  | 8.91414800  | -0.45454900 | -1.21506800 |
| Ti | 10.47288400 | -0.92333500 | -2.06343500 |
| O  | 10.15018600 | -1.68645900 | -3.69649600 |
| Ti | 11.78167400 | -1.27214500 | 0.67181700  |
| O  | 12.74806700 | -2.38347400 | 1.75904100  |
| O  | 11.36350300 | -2.05647000 | -0.93911000 |
| H  | 10.31770100 | -1.29175800 | -4.56353600 |
| H  | 13.68383400 | -2.30073800 | 1.98922700  |
| N  | -6.57848800 | -0.22680800 | -0.71801600 |
| C  | -7.16016000 | -1.52122800 | -0.68791300 |
| C  | -6.64723600 | -2.54703700 | -1.49170100 |
| C  | -8.26214600 | -1.77314100 | 0.13956300  |
| C  | -7.21020300 | -3.81723600 | -1.47017600 |
| H  | -5.80058900 | -2.33995300 | -2.13704300 |
| C  | -8.83301000 | -3.03293500 | 0.14424600  |
| H  | -8.65351200 | -0.97593300 | 0.76385500  |
| C  | -8.30925700 | -4.05972900 | -0.65340000 |
| H  | -6.79756100 | -4.59964900 | -2.10016900 |
| C  | -7.42424000 | 0.91190600  | -0.77813700 |

|   |              |             |             |
|---|--------------|-------------|-------------|
| C | -7.16710200  | 2.02733700  | 0.02982300  |
| C | -8.52413100  | 0.92217500  | -1.64489600 |
| C | -7.99828500  | 3.12984000  | -0.05221500 |
| H | -6.31909600  | 2.01298700  | 0.70733200  |
| C | -9.36964000  | 2.02287400  | -1.71018600 |
| H | -8.71085400  | 0.05625900  | -2.27053400 |
| C | -9.10242400  | 3.13247400  | -0.91595200 |
| H | -10.21772700 | 2.01115000  | -2.38837300 |
| C | -9.79704300  | 4.41835900  | -0.77975700 |
| C | -10.93413400 | 4.91180600  | -1.41083200 |
| C | -9.11144700  | 5.19137900  | 0.16903500  |
| C | -11.38111400 | 6.18983300  | -1.08397900 |
| H | -11.46722800 | 4.31566800  | -2.14577400 |
| C | -9.56083900  | 6.46221700  | 0.49127500  |
| C | -10.70118400 | 6.95963100  | -0.14105700 |
| H | -12.26675000 | 6.59006700  | -1.56793900 |
| H | -9.03714200  | 7.06920200  | 1.22478000  |
| H | -11.06159100 | 7.95421700  | 0.10296900  |
| C | -9.10594000  | -5.27272900 | -0.43309400 |
| C | -10.11100600 | -4.97668300 | 0.49972000  |
| C | -8.99689400  | -6.54714700 | -0.97949100 |
| C | -11.01192300 | -5.95465100 | 0.89043800  |
| C | -9.90515500  | -7.52622000 | -0.58397800 |
| H | -8.21957700  | -6.77995300 | -1.70143900 |
| C | -10.90485900 | -7.23390000 | 0.34295600  |
| H | -11.79414100 | -5.73516900 | 1.61207500  |
| H | -9.83379400  | -8.52602200 | -1.00116500 |
| H | -11.60561900 | -8.00764000 | 0.64110100  |
| C | -5.17653500  | -0.07031300 | -0.70072500 |
| C | -4.56367600  | 0.96362600  | -1.42274600 |

|   |              |             |             |
|---|--------------|-------------|-------------|
| C | -4.36301800  | -0.94218900 | 0.02976400  |
| C | -3.19020200  | 1.12281600  | -1.39850500 |
| H | -5.17352100  | 1.63918100  | -2.01170900 |
| C | -2.98423700  | -0.78764100 | 0.03106700  |
| H | -4.81448200  | -1.74608300 | 0.60004000  |
| C | -2.36632300  | 0.25379300  | -0.66959500 |
| H | -2.74095200  | 1.92165900  | -1.98026100 |
| H | -2.38387400  | -1.47896200 | 0.61458500  |
| C | -7.90453400  | 4.44103600  | 0.71714000  |
| C | -8.02539900  | 4.21434400  | 2.23264600  |
| H | -7.18324600  | 3.62041300  | 2.60207400  |
| H | -8.02162700  | 5.17079400  | 2.76512000  |
| H | -8.95165900  | 3.68781500  | 2.48019600  |
| C | -6.59434700  | 5.18046400  | 0.40040000  |
| H | -5.73158600  | 4.59978100  | 0.74227700  |
| H | -6.48807500  | 5.35185800  | -0.67469400 |
| H | -6.56950300  | 6.15078600  | 0.90649300  |
| C | -10.02795700 | -3.52422700 | 0.95075500  |
| C | -11.30405400 | -2.74963800 | 0.58338400  |
| H | -11.20486800 | -1.69351900 | 0.85415200  |
| H | -11.50743900 | -2.81090100 | -0.48961800 |
| H | -12.16761500 | -3.15568000 | 1.11981300  |
| C | -9.76790300  | -3.41985200 | 2.46211500  |
| H | -9.64771100  | -2.37364800 | 2.76122200  |
| H | -10.60840500 | -3.83672900 | 3.02617000  |
| H | -8.86197900  | -3.96360200 | 2.74510300  |

System 6:

|   |            |            |             |
|---|------------|------------|-------------|
| C | 6.22356400 | 0.76881400 | -0.20513800 |
|---|------------|------------|-------------|

|   |             |             |             |
|---|-------------|-------------|-------------|
| C | 5.88856000  | 2.18995300  | 0.25019800  |
| C | 4.30789100  | 0.78986200  | 1.08754100  |
| C | 5.29846500  | -0.05035300 | 0.28769100  |
| C | 4.55534300  | 2.55254200  | -0.40861000 |
| H | 4.41890000  | 3.32081300  | -1.16154500 |
| C | 3.60424400  | 1.72850000  | 0.07411000  |
| H | 6.66881400  | 2.94818100  | 0.19189000  |
| H | 3.66232000  | 0.28244700  | 1.79966800  |
| C | 5.61203200  | -1.46237300 | -0.21620500 |
| H | 4.81517500  | -2.20453400 | -0.15932500 |
| C | 7.17183000  | -0.06617600 | -1.06815900 |
| H | 7.79393900  | 0.46440400  | -1.78724100 |
| C | 6.96427300  | -1.87916800 | 0.38520200  |
| C | 7.89492600  | -1.03780400 | -0.10148400 |
| C | 2.23665300  | 1.75363900  | -0.36067500 |
| H | 1.96231400  | 2.57553000  | -1.01804000 |
| C | -0.13982900 | 1.18157900  | -0.66437900 |
| C | 1.21808300  | 0.90456700  | -0.08745500 |
| O | -0.34955900 | 2.17714700  | -1.33853900 |
| O | -1.03303600 | 0.27386200  | -0.36567000 |
| N | 9.22178400  | -0.88454700 | 0.26887300  |
| C | 9.71070000  | -1.85663200 | 1.22667400  |
| H | 9.73510600  | -2.87862100 | 0.81521200  |
| H | 10.72188500 | -1.58289000 | 1.53734200  |
| H | 9.06507200  | -1.86080200 | 2.10875000  |
| C | 10.18944500 | -0.54699500 | -0.76341700 |
| H | 11.12697500 | -0.24630300 | -0.28834300 |
| H | 10.40211200 | -1.39118100 | -1.43825800 |
| H | 9.83558200  | 0.29171200  | -1.36356200 |
| C | 1.35541800  | -0.26932600 | 0.71689200  |

|    |             |             |             |
|----|-------------|-------------|-------------|
| N  | 1.45775600  | -1.22715700 | 1.36083500  |
| H  | 7.08323400  | -2.63623500 | 1.14826300  |
| C  | 6.11875400  | -1.06159400 | -1.63547600 |
| H  | 6.56109600  | -1.89846500 | -2.18488700 |
| H  | 5.35897500  | -0.56505000 | -2.24620000 |
| C  | 5.32198700  | 1.82747600  | 1.65856100  |
| H  | 6.07143900  | 1.37528500  | 2.31277300  |
| H  | 4.83766400  | 2.67106500  | 2.16126400  |
| O  | -6.11566500 | 1.44346300  | -0.52422600 |
| Ti | -5.31820600 | 0.25977500  | -1.71445800 |
| Ti | -2.93527700 | 0.01985100  | -0.32142300 |
| O  | -3.35619500 | -1.68428200 | 0.14021800  |
| O  | -3.51307200 | 0.44387900  | -1.99616600 |
| O  | -3.58320500 | 1.08116800  | 1.01559700  |
| O  | -5.87456000 | -1.48756400 | -1.40579700 |
| Ti | -5.18011600 | -1.93153000 | 0.19571600  |
| O  | -5.61204000 | -3.66855400 | 0.58530400  |
| Ti | -5.40689500 | 0.99889900  | 1.07396200  |
| O  | -6.06992200 | 2.13367200  | 2.35067200  |
| O  | -5.80082800 | -0.75893000 | 1.44960400  |
| H  | -5.37144800 | -4.10578800 | 1.41523100  |
| H  | -5.74441700 | 2.15849000  | 3.26229300  |

#### System 6-D

|   |             |             |             |
|---|-------------|-------------|-------------|
| C | -0.58411800 | -0.73679500 | -1.20417000 |
| C | -0.88541400 | -0.83243900 | -2.70203600 |
| C | -2.29062800 | 0.70664400  | -1.79868400 |
| C | -1.40605900 | 0.16759600  | -0.67883100 |
| C | -2.30897800 | -1.38007200 | -2.82359200 |



|    |              |             |             |
|----|--------------|-------------|-------------|
| H  | -2.57239600  | -2.34765800 | -3.23594600 |
| C  | -3.15710700  | -0.48179600 | -2.28555000 |
| H  | -0.14062600  | -1.29620600 | -3.34790900 |
| H  | -2.81265800  | 1.64550600  | -1.63265300 |
| C  | -1.10679200  | 0.25971800  | 0.81688400  |
| H  | -1.85637500  | 0.72674600  | 1.45562100  |
| C  | 0.29079300   | -1.28018500 | -0.07604500 |
| H  | 0.80965600   | -2.22440300 | -0.24032800 |
| C  | 0.32623700   | 0.80152900  | 0.94783600  |
| C  | 1.16780400   | -0.10236700 | 0.42685700  |
| C  | -4.57162900  | -0.69612100 | -2.16337600 |
| H  | -4.97160900  | -1.55410800 | -2.69875100 |
| C  | -6.92938700  | -0.45635800 | -1.49627600 |
| C  | -5.49839600  | -0.00341500 | -1.46119700 |
| O  | -7.28239500  | -1.37190600 | -2.22223300 |
| O  | -7.71685200  | 0.21780000  | -0.69893500 |
| C  | -5.18941400  | 1.12396000  | -0.63790700 |
| N  | -4.94572300  | 2.03354300  | 0.03724900  |
| H  | 0.56931300   | 1.78369700  | 1.33538200  |
| C  | -0.78200000  | -1.24682300 | 1.05428600  |
| H  | -0.36884700  | -1.44702100 | 2.04791700  |
| H  | -1.63086600  | -1.90754600 | 0.85630000  |
| C  | -1.23043800  | 0.67131300  | -2.94130300 |
| H  | -0.38237600  | 1.33504200  | -2.75529800 |
| H  | -1.65563000  | 0.86644600  | -3.93122600 |
| O  | -12.73972500 | -1.18412100 | -0.42668300 |
| Ti | -11.46283700 | -1.65415000 | 0.83632200  |
| Ti | -9.52351800  | 0.11372600  | -0.04874500 |
| O  | -9.73014300  | 1.11089100  | 1.45831900  |
| O  | -9.71750200  | -1.66670500 | 0.27208200  |

|    |              |             |             |
|----|--------------|-------------|-------------|
| O  | -10.67788600 | 0.78414200  | -1.29379500 |
| O  | -11.75254100 | -0.80448100 | 2.46133800  |
| Ti | -11.42934100 | 0.93916700  | 2.13936000  |
| O  | -11.62195500 | 1.89230800  | 3.69143700  |
| Ti | -12.40927000 | 0.56242500  | -0.74150800 |
| O  | -13.59270100 | 1.15632000  | -2.00762800 |
| O  | -12.55280200 | 1.51785900  | 0.82013400  |
| H  | -11.50168400 | 2.85128800  | 3.75158800  |
| H  | -13.57038200 | 2.04906500  | -2.38207500 |
| N  | 6.83733100   | 0.20689600  | -0.18480300 |
| C  | 7.47334200   | 1.47117100  | -0.24397800 |
| C  | 6.88857500   | 2.52014900  | -0.96615200 |
| C  | 8.69075300   | 1.68240600  | 0.41844000  |
| C  | 7.49420200   | 3.76902600  | -1.02702600 |
| H  | 5.95147200   | 2.34730500  | -1.48361100 |
| C  | 9.30049800   | 2.92116500  | 0.33954300  |
| H  | 9.13864300   | 0.87172500  | 0.98435400  |
| C  | 8.70679400   | 3.96956300  | -0.37686100 |
| H  | 7.02334000   | 4.56823000  | -1.59186400 |
| C  | 7.60337000   | -0.98213800 | -0.27269700 |
| C  | 7.31225500   | -2.07018700 | 0.56161700  |
| C  | 8.65496200   | -1.07917800 | -1.19368600 |
| C  | 8.06400300   | -3.22625200 | 0.45737200  |
| H  | 6.50180100   | -1.99121600 | 1.27927000  |
| C  | 9.42032400   | -2.23534500 | -1.28284200 |
| H  | 8.86840000   | -0.23682200 | -1.84241300 |
| C  | 9.12190800   | -3.31437000 | -0.45799900 |
| H  | 10.23156200  | -2.28925200 | -2.00292100 |
| C  | 9.73788200   | -4.64066000 | -0.33177200 |
| C  | 10.80917400  | -5.21729500 | -1.00596000 |

|   |             |             |             |
|---|-------------|-------------|-------------|
| C | 9.05119800  | -5.35270100 | 0.66310200  |
| C | 11.18872400 | -6.51630800 | -0.67608700 |
| H | 11.34362900 | -4.66875600 | -1.77616100 |
| C | 9.43338200  | -6.64448900 | 0.98823600  |
| C | 10.50760900 | -7.22526000 | 0.31253000  |
| H | 12.02273700 | -6.98063000 | -1.19342100 |
| H | 8.90800400  | -7.20384700 | 1.75759800  |
| H | 10.81516100 | -8.23695300 | 0.55856100  |
| C | 9.56945200  | 5.15232100  | -0.27286500 |
| C | 10.68450100 | 4.81737700  | 0.50987200  |
| C | 9.43014700  | 6.43205300  | -0.79968400 |
| C | 11.66488400 | 5.76176000  | 0.76972300  |
| C | 10.41896000 | 7.37716800  | -0.53659000 |
| H | 8.56769000  | 6.69472900  | -1.40541500 |
| C | 11.52760100 | 7.04632700  | 0.24144400  |
| H | 12.53176400 | 5.51259800  | 1.37577900  |
| H | 10.32510600 | 8.38048800  | -0.94072100 |
| H | 12.28995800 | 7.79383900  | 0.43815500  |
| C | 5.43115000  | 0.12918200  | -0.03429900 |
| C | 4.68194800  | -0.78572100 | -0.77645500 |
| C | 4.76223400  | 0.96355900  | 0.86941800  |
| C | 3.30582800  | -0.86790300 | -0.61358500 |
| H | 5.18243400  | -1.43598400 | -1.48583400 |
| C | 3.38832000  | 0.88496000  | 1.01515300  |
| H | 5.33111000  | 1.66961600  | 1.46480800  |
| C | 2.62359900  | -0.03028700 | 0.27614100  |
| H | 2.75190700  | -1.58361900 | -1.21206700 |
| H | 2.89761500  | 1.52938600  | 1.73776900  |
| C | 7.92358000  | -4.51664000 | 1.25426200  |
| C | 8.13390100  | -4.27523000 | 2.75779600  |

|   |             |             |             |
|---|-------------|-------------|-------------|
| H | 7.35037800  | -3.62325600 | 3.15716600  |
| H | 8.09672700  | -5.22143400 | 3.30708600  |
| H | 9.10260500  | -3.80501300 | 2.95015700  |
| C | 6.55407000  | -5.17308300 | 1.01560900  |
| H | 5.74928500  | -4.53044500 | 1.38678300  |
| H | 6.38390300  | -5.35486900 | -0.04951400 |
| H | 6.49052500  | -6.13103900 | 1.54152600  |
| C | 10.61340400 | 3.36706200  | 0.97032800  |
| C | 11.79718200 | 2.54822300  | 0.43057900  |
| H | 11.69743800 | 1.49516200  | 0.71290700  |
| H | 11.85232600 | 2.60674700  | -0.66032000 |
| H | 12.74120000 | 2.91959900  | 0.84215400  |
| C | 10.56266500 | 3.26782300  | 2.50341000  |
| H | 10.44977900 | 2.22554900  | 2.81857800  |
| H | 11.48704300 | 3.65457000  | 2.94432400  |
| H | 9.72379700  | 3.84128800  | 2.90823100  |
